# Supplementary material for: Twist angle-dependent interlayer hybridized exciton lifetimes in van der Waals heterostructures
Source: Royal Society of Chemistry journal article supplement (doi:10.1039/d4nr00661e), 2024-01-01
Supplement: d4nr00661e1.pdf [file d4nr00661e1.pdf]

## Supporting information

### 1. Schematic of the stacking process for the fabrication of heterostructures

Monolayers of  $\text{WS}_2$  and  $\text{MoSe}_2$  and few layers of hBN were prepared by mechanical stripping, respectively. To active modulation of the twist angle between the layers of  $\text{MoSe}_2/\text{WS}_2$ . The second harmonic generation (SHG) signals of the monolayer  $\text{WS}_2$  and  $\text{MoSe}_2$  need to be tested sequentially before stacking to obtain the corresponding crystal orientations. Afterward, a Polycarbonate (PC) film was bonded to the Polydimethylsiloxane (PDMS) surface and combined with a few layers of hBN as a pick-up "gripper" to pick up  $\text{MoSe}_2$  first, and based on the second harmonic generation results, the position of  $\text{MoSe}_2$  and  $\text{WS}_2$  was adjusted to the interlayer angle of  $\theta$  by controlling the deflection angle of the displacement stage with high-precision transfer, then  $\text{WS}_2$  was picked up, and hBN was picked up by repeating the above steps, to obtain the hBN/ $\text{MoSe}_2/\text{WS}_2/\text{hBN}$  heterojunction. The friction vice prepared above was immersed in chloroform for 2 min to remove the residual adhesive film on the surface of the sample to ensure a clean surface. Finally, the samples were stored in a vacuum environment and heated to 280 °C for annealing for 8 hours.

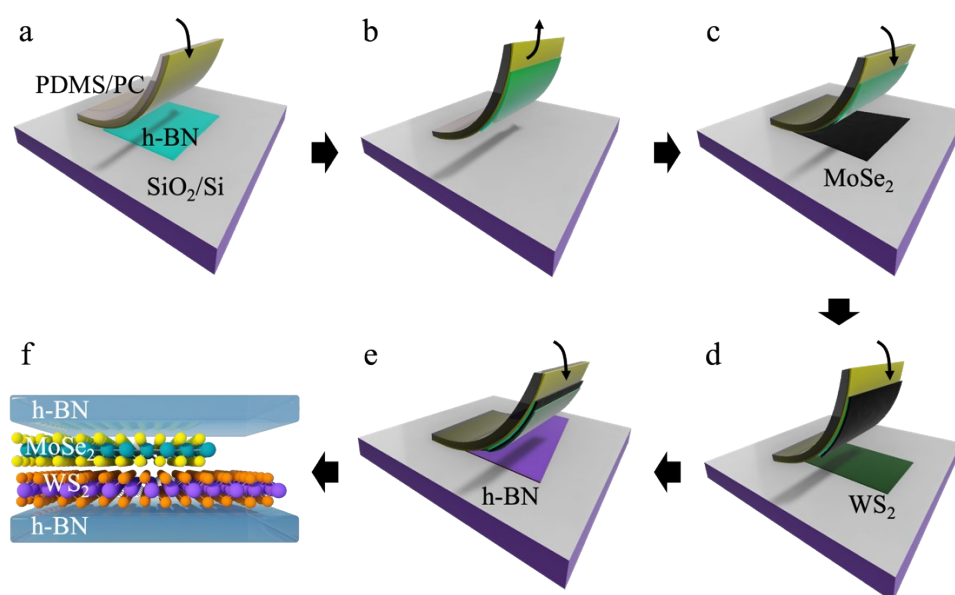

Figure S1 Pick and leave technology for assembly of van der Waals heterostructures. (a–f) Sequential device fabrication method, describing the tear-and-stack co-lamination process used to create the hBN/ $\text{MoSe}_2/\text{WS}_2/\text{hBN}$  stacks.

### 2. Lifetime components filtered by 785/60 nm bandpass filter

To eliminate the effect of the instrumental response function (IRF), we used the tail-fitting method. The fitting results are shown in Table S1. Among them,

the short-lived component ( $\tau_1$ ) is attributed to the hybridized exciton. The long-lived component ( $\tau_2$ ) is attributed to effects related to surface defect, substrate and strains.

**Table S1. Twist-angle dependent exciton lifetimes and population**

| twist angle (°) | $\tau_1$ (ns) | $A_1$ (%) | $\tau_2$ (ns) | $A_2$ (%) |
|-----------------|---------------|-----------|---------------|-----------|
| 1               | 3.32          | 93.7      | 0.57          | 6.3       |
| 3               | 2.73          | 91.4      | 0.55          | 8.6       |
| 5               | 1.38          | 91.1      | 0.58          | 8.9       |
| 7               | 1.13          | 93.9      | 0.553         | 6.1       |
| 10              | 0.54          | 94.0      | 0.54          | 6.0       |
| 12              | 0.502         | 92.2      | 0.502         | 7.8       |
